# Supplementary material for: Endophytic Fungi Produce Gibberellins and Indoleacetic Acid and Promotes Host-Plant Growth during Stress
Source: Molecules. 2012 Sep 7;17(9):10754–73. doi: 10.3390/molecules170910754 (PMC6268353; doi:10.3390/molecules170910754)
Supplement: Supplementary file 1 [file molecules-17-10754-s001.pdf]

Supplementary Information 1

Identification of endophytic fungal isolates. Endophytic fungi were indentified through the phylogenetic analysis of 18S and 28S rDNA sequences using maximum parsimony method with related fungi. The sequence analysis showed that the endophytic fungal isolates are new strains of *Penicillium* sp., and *Phoma glomerata*.

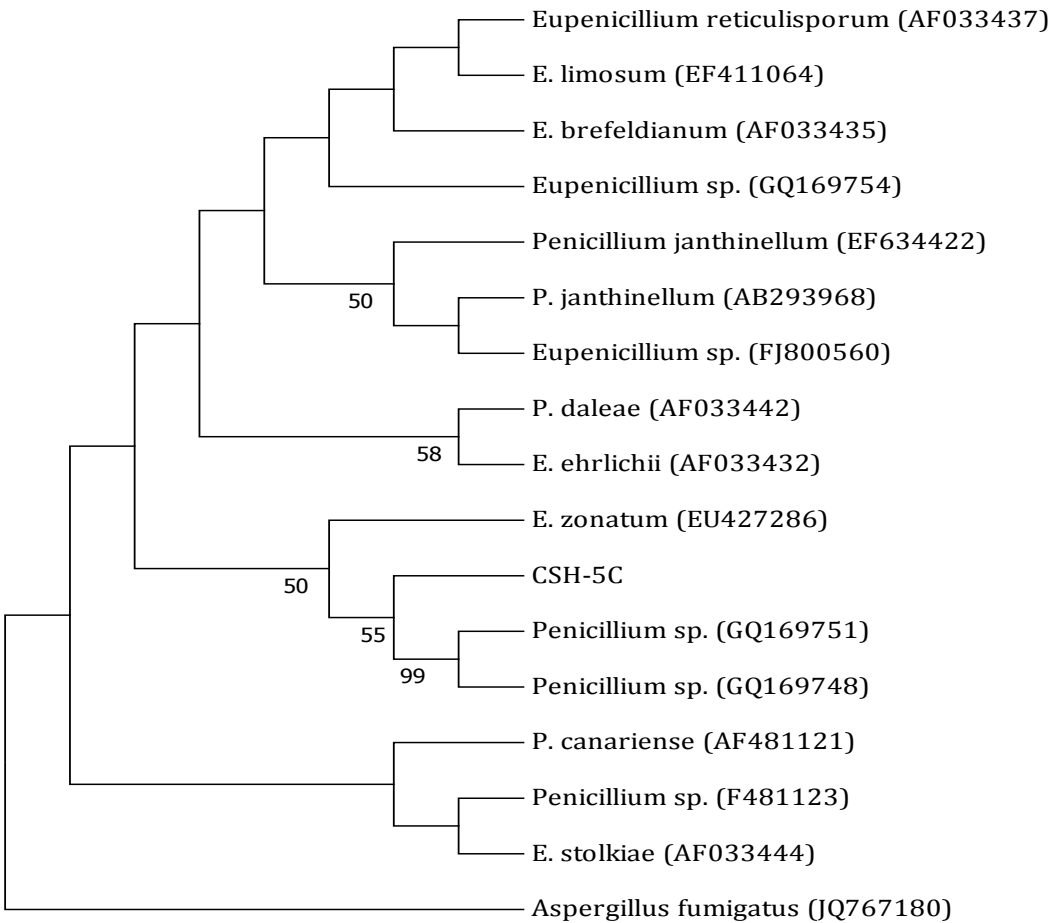

A.

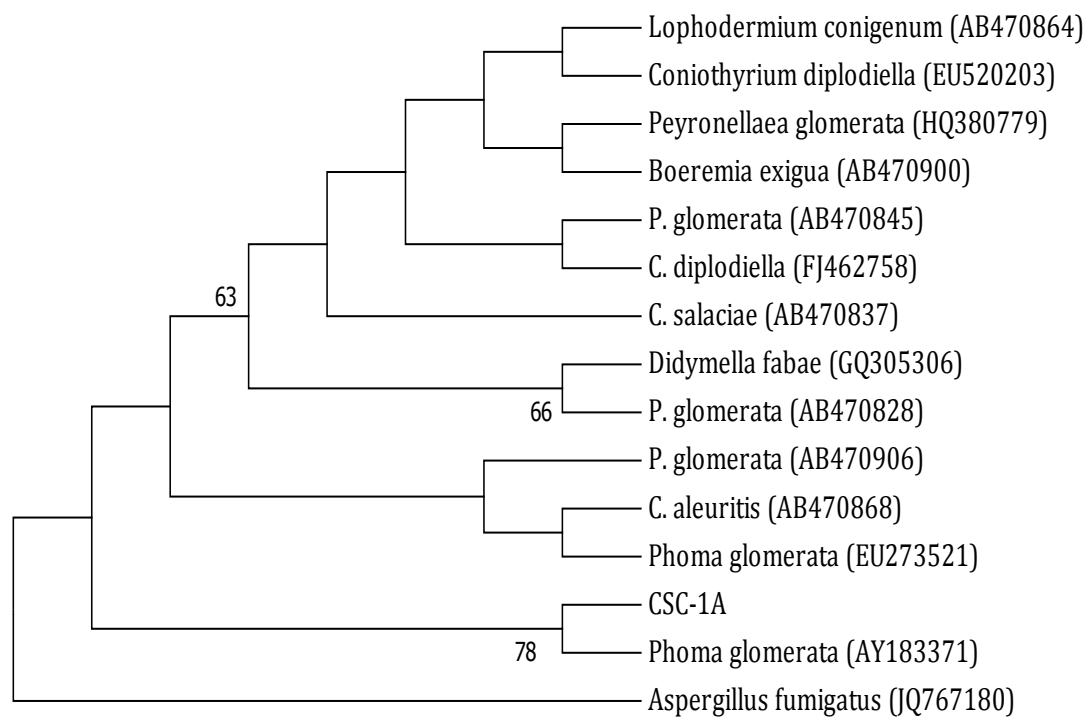

B.

## Supplementary Information 2

GC/MS-SIM analysis of HPLC fractions of pure culture filtrate of endophyte.

| HPLC fraction No /RT | RT <sup>a</sup> | Sample/Standard | GAs <sup>b</sup>                                | KRI <sup>c</sup> | <i>m/z</i> (% , relative intensity of base peak) <sup>d</sup> |         |         |
|----------------------|-----------------|-----------------|-------------------------------------------------|------------------|---------------------------------------------------------------|---------|---------|
| 11~15                | 24.3            | sample          | GA <sub>1</sub>                                 | 2674             | 506(100)                                                      | 491(13) | 313(17) |
|                      |                 | standard        | [ <sup>2</sup> H <sub>2</sub> ] GA <sub>1</sub> | 2674             | 508(100)                                                      | 493(15) | 315(19) |
| 11~15                | 25.48           | sample          | GA <sub>3</sub>                                 | 2692             | 504(100)                                                      | 489(8)  | 370(9)  |
|                      |                 | standard        | [ <sup>2</sup> H <sub>2</sub> ] GA <sub>3</sub> | 2692             | 506(100)                                                      | 491(10) | 372(11) |
| 34~35                | 24.31           | sample          | GA <sub>4</sub>                                 | 2506             | 284(100)                                                      | 225(80) | 289(70) |
|                      |                 | standard        | [ <sup>2</sup> H <sub>2</sub> ] GA <sub>4</sub> | 2506             | 286(100)                                                      | 227(76) | 291(71) |
| 37~38                | 23.49           | sample          | GA <sub>9</sub>                                 | 2305             | 298(100)                                                      | 270(78) | 227(48) |
|                      |                 | standard        | [ <sup>2</sup> H <sub>2</sub> ] GA <sub>9</sub> | 2305             | 300(100)                                                      | 272(77) | 229(48) |

<sup>a</sup> RT: Retention time (in min); <sup>b</sup> GAs: Gibberellins; <sup>c</sup> KRI: Kovats retention indices; <sup>d</sup> Identified as methyl ester trimethylsilyl ether derivatives by comparison with reference spectra and KRI data as elucidated by Gaskin and MacMillan (1991). Gibberellins are identified with three ions and quantified by first ion with comparison of labelled standards. About 50 µL of CF extract of CSH-6H results in various HPLC fractions.

## Supplementary Information 3

## GC/MS Peaks of the CF of the Endophyte and standard

GA<sub>1</sub> Spectra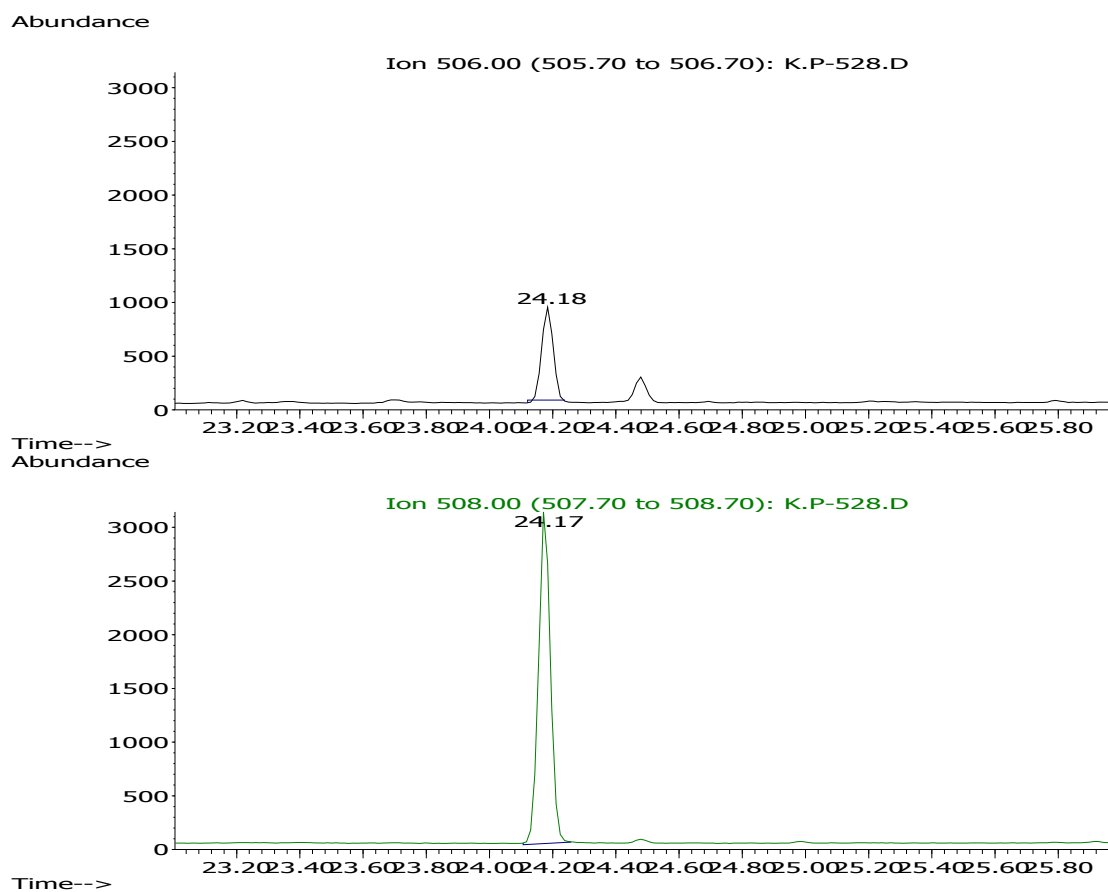

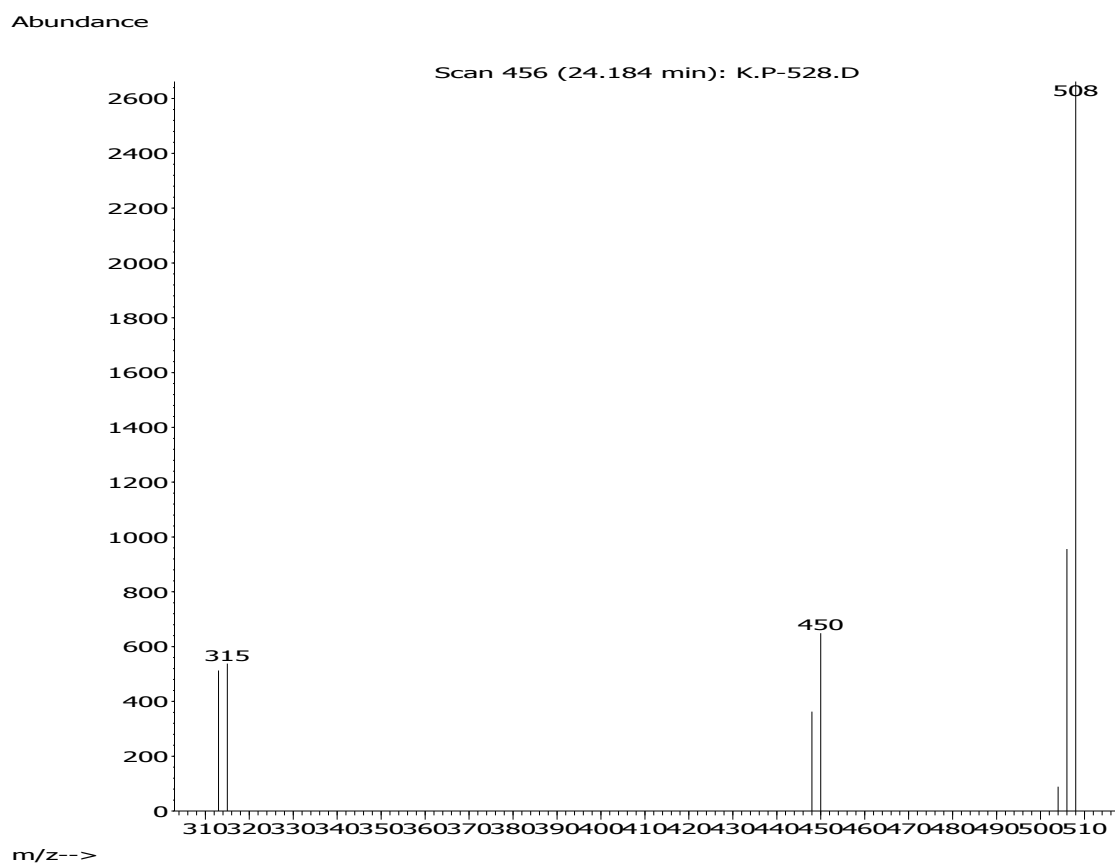

GA3 Spectra

Abundance

Ion 504.00 (503.70 to 504.70): O.Q.260.D

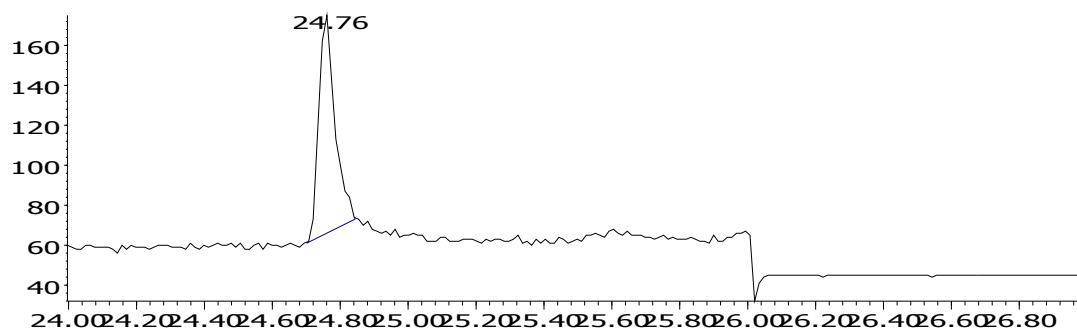

Time--&gt;

Abundance

Ion 506.00 (505.70 to 506.70): O.Q.260.D

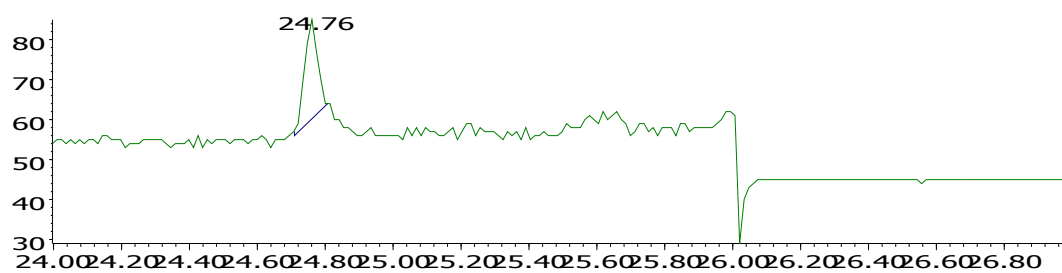

Time--&gt;

Abundance

Scan 499 (24.760 min): O.Q.260.D

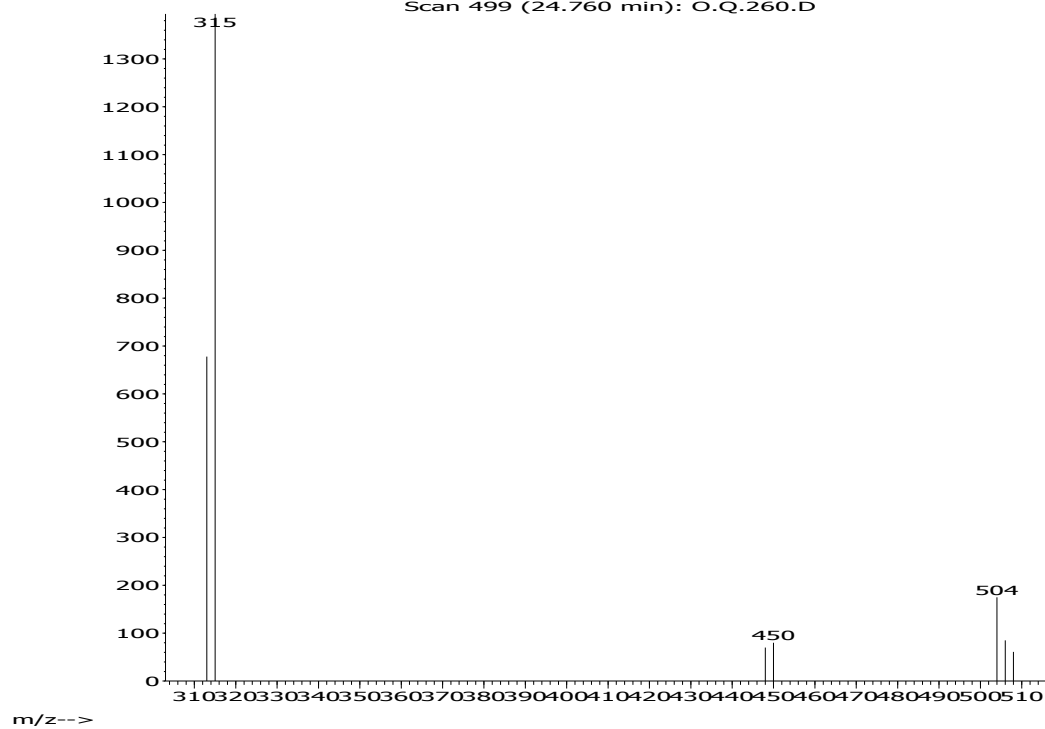

GA<sub>9</sub> Spectra

Abundance

Ion 298.00 (297.70 to 298.70): M.Q.519.D

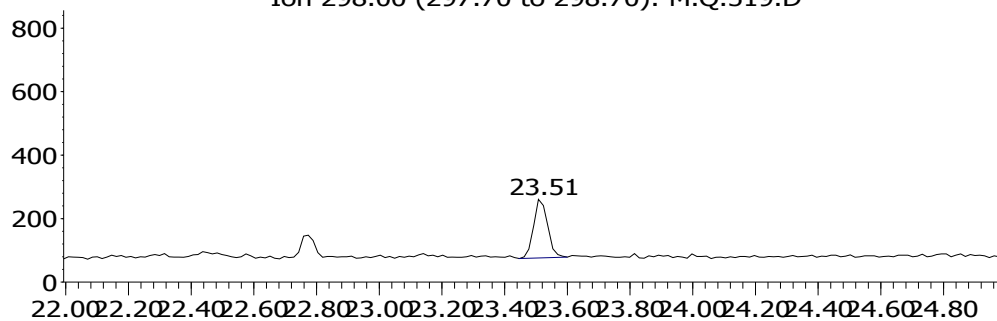Time-->  
Abundance

Ion 300.00 (299.70 to 300.70): M.Q.519.D

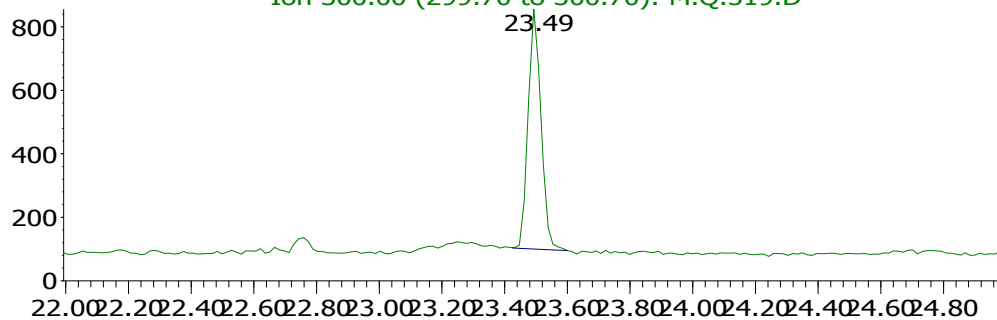Time-->  
Abundance

Scan 1054 (23.198 min): O.Q.262.D

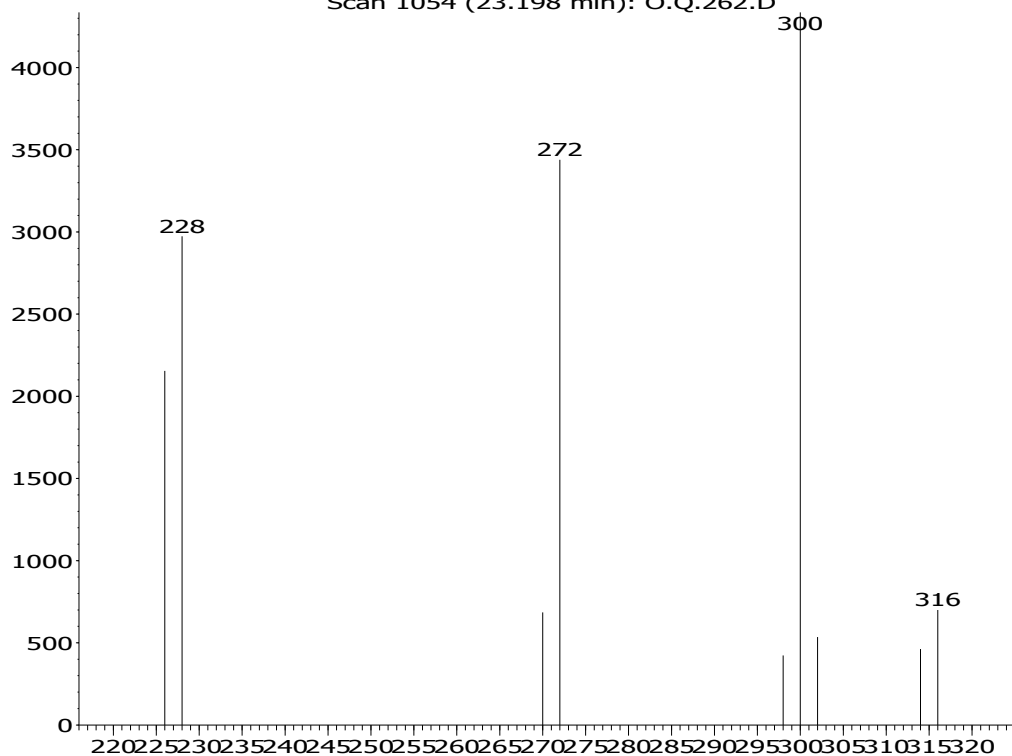

m/z--&gt;

**Supplementary Information 4**

GC/MS–SIM conditions used for analysis and quantification of the Gibberellins.

|                      |                                                                                                              |
|----------------------|--------------------------------------------------------------------------------------------------------------|
| Equipment            | Hewlett-Packard 6890, 5973N Mass Selective Detector                                                          |
| Column               | HP-1 capillary column (30 m × 0.25 mm i.d. 0.25µm film thickness)<br>(J & W Scientific Co., Folsom, CA, USA) |
| Carrier gas          | He (40 Mℓ/min.); head pressure of 30 kPa                                                                     |
| Source temperature   | 250 °C                                                                                                       |
| Oven conditions      | GA: 60 °C (1 min.) → 15 °C /min. → 200 °C (1 min.) →<br>5 °C /min. → 285 °C (5 min.)                         |
| Injector temperature | 200 °C                                                                                                       |
| Ionizing voltage     | 70 ev                                                                                                        |
